# Supplementary material for: The Link between ADHD Symptoms and Antisocial Behavior: The Moderating Role of the Protective Factor Sense of Coherence
Source: MDPI journal article supplement (doi:10.3390/brainsci12101336), 2022-10-03
Supplement: s1 [file s1]

**Supplementary:**

*Table S1- Nonparametric Correlations between demographic characteristics, ADHD symptoms, antisocial behavior types and coherence.*

|                                            | Age     | Gender  | Religiosity | Emotional symptoms |
|--------------------------------------------|---------|---------|-------------|--------------------|
| <b>ADHD symptoms</b>                       | -.123** | -0.008  | -.148**     | .343**             |
| <b>Severe physical antisocial behavior</b> | -.252** | -.087** | -.044**     | .065**             |
| <b>Mild physical antisocial behavior</b>   | -.240** | -.109** | -0.008      | .101**             |
| <b>Verbal antisocial behavior</b>          | -.233** | -.080** | -.157**     | .173**             |
| <b>Property crimes</b>                     | -.210** | -.104** | -.144**     | .136**             |
| <b>Public order crimes</b>                 | -.246** | -.059** | -.178**     | .100**             |
| <b>Drug use</b>                            | .053    | -.348** | -.231**     | -0.004             |
| <b>Coherence</b>                           | .208**  | -.099** | .290**      | -.606**            |

\*\* . Correlation is significant at the 0.01 level (2-tailed).

Table S2- Pearson correlations between the research variables

|                                               | 1       | 2       | 3       | 4       | 5       | 6       | 7       | 8 |
|-----------------------------------------------|---------|---------|---------|---------|---------|---------|---------|---|
| <b>1. ADHD symptoms</b>                       | 1       |         |         |         |         |         |         |   |
| <b>2. Severe physical antisocial behavior</b> | .220**  | 1       |         |         |         |         |         |   |
| <b>3. Mild physical antisocial behavior</b>   | .233**  | .694**  | 1       |         |         |         |         |   |
| <b>4. Verbal antisocial behavior</b>          | .249**  | .451**  | .574**  | 1       |         |         |         |   |
| <b>5. Property crimes</b>                     | .173**  | .655**  | .574**  | .382**  | 1       |         |         |   |
| <b>6. Public order crimes</b>                 | .269**  | .453**  | .489**  | .543**  | .443**  | 1       |         |   |
| <b>7. Drug use</b>                            | .127**  | .286**  | .265**  | .270**  | .300**  | .362**  | 1       |   |
| <b>8. Coherence</b>                           | -.424** | -.215** | -.307** | -.380** | -.229** | -.309** | -.129** | 1 |

\*\* . Correlation is significant at the 0.01 level (2-tailed).
